# Supplementary material
Source: PubMed Central journal article supplement (PMC8331167)
Supplement: kiab224_supplementary_data.pdf [file kiab224_supplementary_data.pdf]

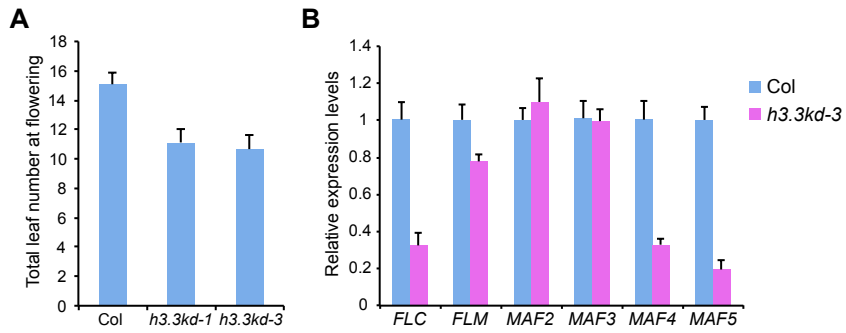

**Supplemental Figure S1. Flowering phenotype and gene expression analyses in *h3.3kd* lines.**

(A) The flowering time of *h3.3kd* lines grown in long days. The total number of primary rosette and cauline leaves at flowering were counted; 12 plants for each line were scored. Values are means  $\pm$  SD.

(B) Expression profiles of *FLC* and its homologs in Col and *h3.3kd-3* determined by RT-qPCR. *TUB2* was used as an endogenous control. Values are means  $\pm$  SD of three biological repeats.

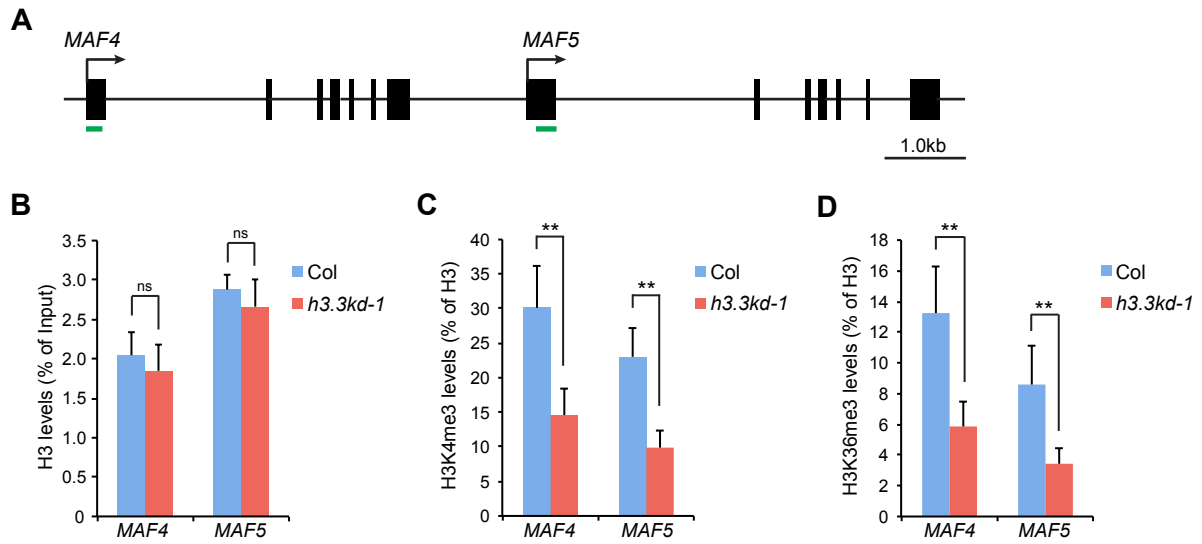

**Supplemental Figure S2. Chromatin modification changes at *MAF4* and *MAF5* in *h3.3kd-1*.**

(A) Schematic structure of *MAF4* and *MAF5*. Filled boxes represent exons; arrows indicate the transcription start sites. ChIP examined regions are indicated by green lines.

(B)-(D) H3 (B), H3K4me3 (C) and H3K36me3 (D) enrichment levels at *MAF4* and *MAF5* transcription start sites determined by ChIP. The amounts of immunoprecipitated DNA fragments were quantified by qPCR, and subsequently normalized to input DNA or H3 antibody-precipitated DNA. Values are means  $\pm$  SD of three biological repeats. Statistical significance was determined by two-tailed Student's t-test (\*\*,  $P < 0.01$ ; ns, not significant,  $P > 0.05$ ).

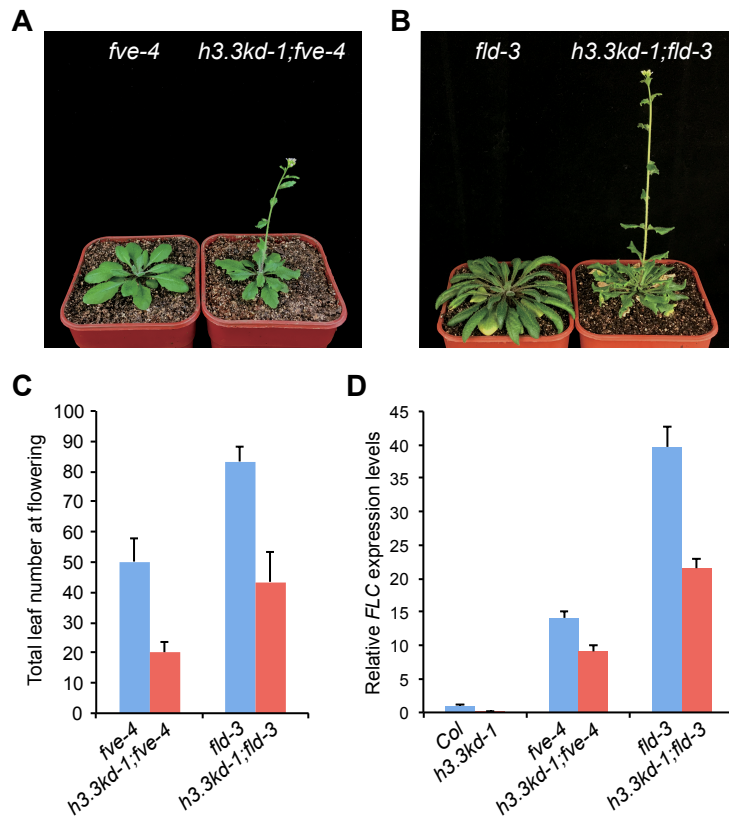

**Supplemental Figure S3. *h3.3kd-1* represses the late flowering phenotypes of *fve-4* and *fld-3*.**

(A) and (B) The flowering phenotypes of *h3.3kd-1;fve-4* (A) and *h3.3kd-1;fld-3* (B) grown in long days.

(C) The flowering time of indicated lines grown in long days. The total number of primary rosette and cauline leaves at flowering were counted; 10 plants were scored for *fve-4* and *fld-3*, 16 plants were scored for *h3.3kd-1;fve-4* and *h3.3kd-1;fld-3*. Values are means ± SD.

(D) Relative *FLC* transcripts determined by RT-qPCR. *TUB2* was used as an endogenous control. Values are means ± SD of three biological repeats.

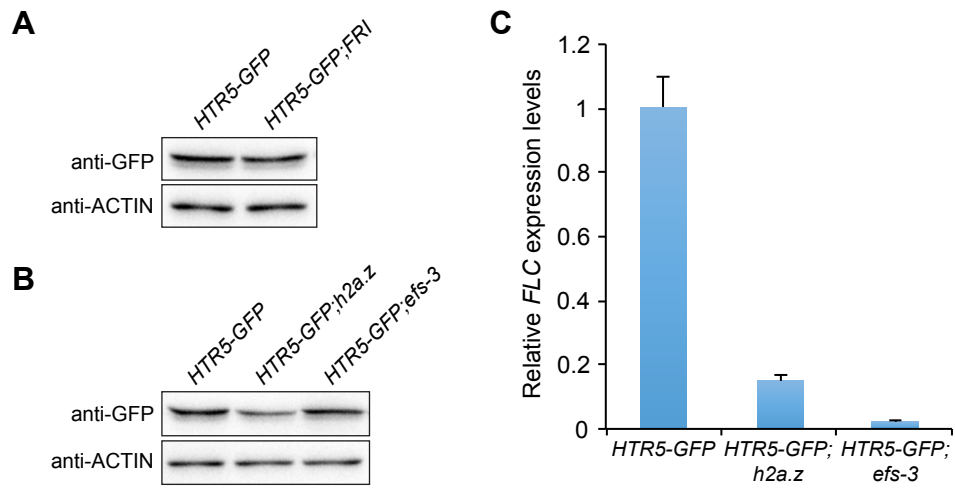

**Supplemental Figure S4. HTR5-GFP and FLC expression in HTR5-GFP-related lines.**

(A) and (B) HTR5-GFP protein expression levels in indicated lines determined by western blot.

(C) Relative transcripts of *FLC* in indicated lines determined by RT-qPCR. *TUB2* was used as an endogenous control. Values are means  $\pm$  SD of three biological repeats.

**A**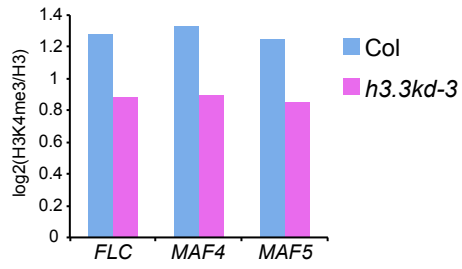**B**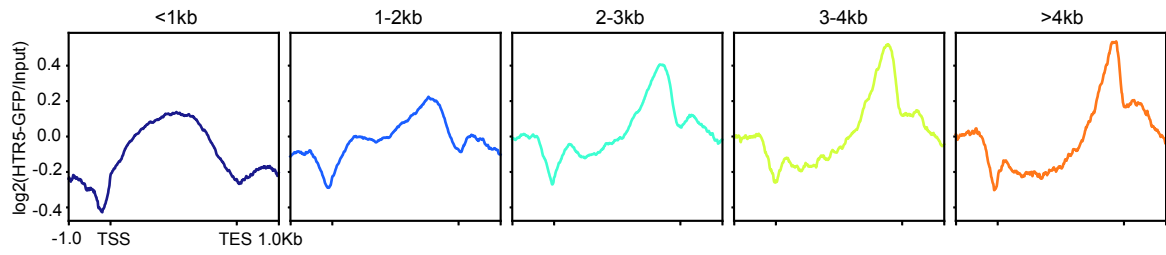**Supplemental Figure S5. ChIP-seq analysis of H3K4me3 and HTR5-GFP distribution.**

(A) Normalized H3K4me3 values over the gene body of *FLC*, *MAF4*, and *MAF5* in Col and *h3.3kd-3* determined by ChIP-seq.  
(B) Normalized ChIP-seq profiles of HTR5-GFP enrichment over genes with different lengths.

**Supplemental Table S1.** List of genes at which H3K4me3 changed more than 1.5-fold in *h3.3kd-3*.

| H3K4me3 decreased in <i>h3.3kd-3</i> | H3K4me3 increased in <i>h3.3kd-3</i> |
|--------------------------------------|--------------------------------------|
| AT1G01335                            | AT1G02110                            |
| AT1G03325                            | AT1G03120                            |
| AT1G04645                            | AT1G09250                            |
| AT1G04895                            | AT1G09815                            |
| AT1G05290                            | AT1G10100                            |
| AT1G06920                            | AT1G15825                            |
| AT1G07600                            | AT1G15830                            |
| AT1G07901                            | AT1G15900                            |
| AT1G08985                            | AT1G16910                            |
| AT1G09030                            | AT1G19020                            |
| AT1G09483                            | AT1G19200                            |
| AT1G09935                            | AT1G31243                            |
| AT1G10480                            | AT1G31350                            |
| AT1G11450                            | AT1G32570                            |
| AT1G12190                            | AT1G35560                            |
| AT1G13485                            | AT1G45163                            |
| AT1G13620                            | AT1G45165                            |
| AT1G13680                            | AT1G48940                            |
| AT1G15085                            | AT1G49640                            |
| AT1G15590                            | AT1G50640                            |
| AT1G15757                            | AT1G52618                            |
| AT1G16400                            | AT1G53542                            |
| AT1G17000                            | AT1G54120                            |
| AT1G17020                            | AT1G61170                            |
| AT1G17710                            | AT1G62960                            |
| AT1G17780                            | AT1G63840                            |
| AT1G19510                            | AT1G64455                            |
| AT1G19920                            | AT1G70209                            |
| AT1G20100                            | AT1G74280                            |
| AT1G20687                            | AT1G76590                            |
| AT1G21550                            | AT1G79800                            |
| AT1G21864                            | AT2G10557                            |
| AT1G21866                            | AT2G12461                            |
| AT1G22010                            | AT2G15440                            |
| AT1G23120                            | AT2G18465                            |
| AT1G23150                            | AT2G19570                            |
| AT1G23250                            | AT2G20515                            |
| AT1G23260                            | AT2G21060                            |
| AT1G23570                            | AT2G21185                            |
| AT1G23580                            | AT2G22170                            |
| AT1G23610                            | AT2G23120                            |
| AT1G23645                            | AT2G23130                            |

---

|           |           |
|-----------|-----------|
| AT1G23660 | AT2G23320 |
| AT1G23680 | AT2G25650 |
| AT1G23840 | AT2G28725 |
| AT1G23910 | AT2G29500 |
| AT1G26515 | AT2G37330 |
| AT1G26700 | AT2G38050 |
| AT1G26780 | AT2G40080 |
| AT1G26796 | AT2G41660 |
| AT1G26799 | AT2G43550 |
| AT1G26815 | AT2G45610 |
| AT1G26920 | AT2G46000 |
| AT1G27020 | AT2G46735 |
| AT1G27610 | AT2G47130 |
| AT1G28030 | AT3G01513 |
| AT1G28305 | AT3G02550 |
| AT1G29100 | AT3G05425 |
| AT1G29450 | AT3G09480 |
| AT1G29490 | AT3G10439 |
| AT1G29510 | AT3G10930 |
| AT1G29600 | AT3G12833 |
| AT1G29962 | AT3G13075 |
| AT1G31090 | AT3G14320 |
| AT1G31095 | AT3G15300 |
| AT1G31255 | AT3G18850 |
| AT1G31530 | AT3G19150 |
| AT1G31580 | AT3G26110 |
| AT1G32920 | AT3G29140 |
| AT1G33640 | AT3G44140 |
| AT1G33880 | AT3G44950 |
| AT1G34000 | AT3G46666 |
| AT1G34640 | AT3G52360 |
| AT1G35181 | AT3G52960 |
| AT1G35625 | AT3G53650 |
| AT1G37130 | AT3G57120 |
| AT1G40086 | AT3G61880 |
| AT1G43010 | AT3G62499 |
| AT1G43140 | AT3G62695 |
| AT1G43600 | AT4G01670 |
| AT1G44180 | AT4G07408 |
| AT1G45015 | AT4G12005 |
| AT1G45201 | AT4G15025 |
| AT1G47300 | AT4G20290 |
| AT1G47389 | AT4G22250 |
| AT1G47400 | AT4G24080 |
| AT1G47600 | AT4G25480 |
| AT1G47690 | AT4G30650 |

---

---

|           |           |
|-----------|-----------|
| AT1G47780 | AT4G32150 |
| AT1G47790 | AT4G36791 |
| AT1G48390 | AT4G36795 |
| AT1G48630 | AT4G38700 |
| AT1G48800 | AT4G38781 |
| AT1G48910 | AT4G39730 |
| AT1G49100 | AT5G03140 |
| AT1G49205 | AT5G03700 |
| AT1G49880 | AT5G04475 |
| AT1G50870 | AT5G08330 |
| AT1G50960 | AT5G14280 |
| AT1G51000 | AT5G15008 |
| AT1G51010 | AT5G15745 |
| AT1G51030 | AT5G15970 |
| AT1G51035 | AT5G21050 |
| AT1G51230 | AT5G24470 |
| AT1G51240 | AT5G41071 |
| AT1G51320 | AT5G41920 |
| AT1G51480 | AT5G42110 |
| AT1G51490 | AT5G47550 |
| AT1G51805 | AT5G54095 |
| AT1G51810 | AT5G57070 |
| AT1G51820 | AT5G58790 |
| AT1G51823 | AT5G59870 |
| AT1G51850 | AT5G62180 |
| AT1G51870 | AT5G63500 |
| AT1G51880 | AT5G65207 |
| AT1G51900 | AT5G67190 |
| AT1G51910 |           |
| AT1G52040 |           |
| AT1G52070 |           |
| AT1G52270 |           |
| AT1G52470 |           |
| AT1G52695 |           |
| AT1G52900 |           |
| AT1G53030 |           |
| AT1G53610 |           |
| AT1G53690 |           |
| AT1G54620 |           |
| AT1G54700 |           |
| AT1G54740 |           |
| AT1G55010 |           |
| AT1G55030 |           |
| AT1G55260 |           |
| AT1G55430 |           |
| AT1G55650 |           |

---



---

AT1G56260  
AT1G56380  
AT1G56510  
AT1G57565  
AT1G57570  
AT1G58225  
AT1G58310  
AT1G58460  
AT1G59460  
AT1G59630  
AT1G59690  
AT1G59723  
AT1G59730  
AT1G59790  
AT1G59865  
AT1G60050  
AT1G60280  
AT1G60983  
AT1G60985  
AT1G60987  
AT1G61093  
AT1G61105  
AT1G61130  
AT1G61165  
AT1G61660  
AT1G61840  
AT1G62060  
AT1G62110  
AT1G62220  
AT1G62270  
AT1G62410  
AT1G62530  
AT1G63200  
AT1G63205  
AT1G63206  
AT1G64000  
AT1G64480  
AT1G64585  
AT1G64633  
AT1G64770  
AT1G64795  
AT1G65050  
AT1G65486  
AT1G65630  
AT1G65860  
AT1G65910

---

---

AT1G65985  
AT1G66180  
AT1G66300  
AT1G66310  
AT1G66360  
AT1G66480  
AT1G66770  
AT1G67150  
AT1G67260  
AT1G67910  
AT1G68040  
AT1G68526  
AT1G68800  
AT1G69085  
AT1G69660  
AT1G69880  
AT1G69970  
AT1G69980  
AT1G70030  
AT1G70380  
AT1G70949  
AT1G72645  
AT1G73270  
AT1G73610  
AT1G73620  
AT1G74458  
AT1G74650  
AT1G74929  
AT1G75920  
AT1G75940  
AT1G75945  
AT1G77160  
AT1G77682  
AT1G78780  
AT2G01023  
AT2G01240  
AT2G01670  
AT2G01760  
AT2G02120  
AT2G02310  
AT2G02455  
AT2G03320  
AT2G04025  
AT2G04066  
AT2G04395  
AT2G04800

---

---

AT2G04830  
AT2G05060  
AT2G05140  
AT2G05410  
AT2G06850  
AT2G10535  
AT2G10553  
AT2G11205  
AT2G12465  
AT2G13126  
AT2G13422  
AT2G13810  
AT2G14210  
AT2G14560  
AT2G14580  
AT2G14620  
AT2G14635  
AT2G14810  
AT2G14920  
AT2G15029  
AT2G15080  
AT2G15390  
AT2G15960  
AT2G16225  
AT2G16575  
AT2G16580  
AT2G18490  
AT2G18721  
AT2G19510  
AT2G19800  
AT2G20619  
AT2G20873  
AT2G21040  
AT2G21900  
AT2G22000  
AT2G22040  
AT2G22190  
AT2G22750  
AT2G22960  
AT2G23240  
AT2G23570  
AT2G23834  
AT2G23910  
AT2G23960  
AT2G24470  
AT2G24510

---

---

AT2G24945  
AT2G26580  
AT2G26850  
AT2G27030  
AT2G27535  
AT2G27750  
AT2G27770  
AT2G28020  
AT2G28970  
AT2G28990  
AT2G29000  
AT2G29125  
AT2G29840  
AT2G29870  
AT2G30432  
AT2G30660  
AT2G30770  
AT2G30890  
AT2G31082  
AT2G31083  
AT2G31180  
AT2G31230  
AT2G32860  
AT2G32870  
AT2G32880  
AT2G33233  
AT2G33880  
AT2G34600  
AT2G34825  
AT2G35310  
AT2G38300  
AT2G38350  
AT2G39590  
AT2G39705  
AT2G40110  
AT2G40995  
AT2G41390  
AT2G41415  
AT2G41417  
AT2G42475  
AT2G43670  
AT2G43910  
AT2G44340  
AT2G44745  
AT2G45180  
AT2G45406

---

---

AT2G46308  
AT3G01220  
AT3G01230  
AT3G01324  
AT3G01329  
AT3G02960  
AT3G04180  
AT3G04943  
AT3G05080  
AT3G05460  
AT3G06000  
AT3G06280  
AT3G06895  
AT3G06970  
AT3G09922  
AT3G10195  
AT3G12240  
AT3G13240  
AT3G13370  
AT3G13403  
AT3G13404  
AT3G14260  
AT3G14280  
AT3G14560  
AT3G14820  
AT3G14981  
AT3G15111  
AT3G15548  
AT3G15909  
AT3G16117  
AT3G16220  
AT3G16360  
AT3G17155  
AT3G17227  
AT3G17540  
AT3G18260  
AT3G19030  
AT3G19035  
AT3G19140  
AT3G20557  
AT3G20898  
AT3G20993  
AT3G21260  
AT3G21405  
AT3G21730  
AT3G21860

---

---

AT3G21950  
AT3G22057  
AT3G22415  
AT3G22700  
AT3G22710  
AT3G22720  
AT3G23170  
AT3G24225  
AT3G24280  
AT3G24790  
AT3G24890  
AT3G25180  
AT3G25505  
AT3G25597  
AT3G25655  
AT3G25905  
AT3G26200  
AT3G26250  
AT3G26450  
AT3G26460  
AT3G26610  
AT3G26790  
AT3G26940  
AT3G26960  
AT3G27650  
AT3G27720  
AT3G28210  
AT3G28280  
AT3G28570  
AT3G28580  
AT3G28770  
AT3G28956  
AT3G29035  
AT3G29050  
AT3G29797  
AT3G30580  
AT3G30725  
AT3G30841  
AT3G42148  
AT3G42830  
AT3G43250  
AT3G43415  
AT3G43572  
AT3G43645  
AT3G43800  
AT3G43890

---

---

AT3G43910  
AT3G44060  
AT3G44090  
AT3G44555  
AT3G44700  
AT3G44718  
AT3G44766  
AT3G44800  
AT3G44805  
AT3G45160  
AT3G45248  
AT3G45470  
AT3G45577  
AT3G45580  
AT3G45673  
AT3G46350  
AT3G46355  
AT3G46410  
AT3G47030  
AT3G47150  
AT3G47210  
AT3G47250  
AT3G47360  
AT3G47480  
AT3G47870  
AT3G48231  
AT3G49760  
AT3G50123  
AT3G50150  
AT3G50470  
AT3G51644  
AT3G52450  
AT3G52720  
AT3G53070  
AT3G53250  
AT3G55180  
AT3G55672  
AT3G56020  
AT3G56220  
AT3G56240  
AT3G56520  
AT3G57510  
AT3G57850  
AT3G58000  
AT3G58350  
AT3G58390

---

---

AT3G59250  
AT3G59455  
AT3G60090  
AT3G61177  
AT3G61220  
AT3G61340  
AT3G61826  
AT3G61900  
AT3G62420  
AT3G63088  
AT4G00420  
AT4G00880  
AT4G00920  
AT4G01430  
AT4G01435  
AT4G01520  
AT4G01680  
AT4G01770  
AT4G02075  
AT4G02300  
AT4G02733  
AT4G03170  
AT4G03505  
AT4G03565  
AT4G03625  
AT4G04620  
AT4G05250  
AT4G05590  
AT4G07455  
AT4G08140  
AT4G08263  
AT4G08535  
AT4G08875  
AT4G08910  
AT4G08930  
AT4G09190  
AT4G09462  
AT4G09890  
AT4G09950  
AT4G10160  
AT4G10410  
AT4G11211  
AT4G11393  
AT4G12190  
AT4G12380  
AT4G12382

---



---

AT4G12490  
AT4G12810  
AT4G13060  
AT4G13195  
AT4G13770  
AT4G14020  
AT4G14640  
AT4G15060  
AT4G15290  
AT4G15310  
AT4G15340  
AT4G15380  
AT4G15390  
AT4G15670  
AT4G15700  
AT4G15870  
AT4G16095  
AT4G16200  
AT4G17585  
AT4G17670  
AT4G17850  
AT4G18260  
AT4G18340  
AT4G18580  
AT4G18823  
AT4G18870  
AT4G18930  
AT4G18960  
AT4G19100  
AT4G20970  
AT4G20990  
AT4G21010  
AT4G21192  
AT4G21200  
AT4G21870  
AT4G22060  
AT4G22105  
AT4G22440  
AT4G22680  
AT4G23360  
AT4G23370  
AT4G23373  
AT4G23590  
AT4G23870  
AT4G24231  
AT4G24600

---

---

AT4G24644  
AT4G25400  
AT4G26250  
AT4G26260  
AT4G26290  
AT4G26950  
AT4G27415  
AT4G29160  
AT4G29273  
AT4G29290  
AT4G29470  
AT4G29710  
AT4G31355  
AT4G32370  
AT4G33790  
AT4G34600  
AT4G34810  
AT4G35165  
AT4G36370  
AT4G36590  
AT4G37500  
AT4G37800  
AT4G37810  
AT4G37850  
AT4G38060  
AT4G39190  
AT4G39510  
AT4G40042  
AT5G02690  
AT5G03580  
AT5G03600  
AT5G03840  
AT5G04370  
AT5G05050  
AT5G06040  
AT5G07460  
AT5G07545  
AT5G11740  
AT5G12236  
AT5G12880  
AT5G14000  
AT5G14275  
AT5G14410  
AT5G14740  
AT5G14750  
AT5G15025

---

---

AT5G15100  
AT5G15533  
AT5G15581  
AT5G15830  
AT5G16350  
AT5G16360  
AT5G17130  
AT5G17800  
AT5G18050  
AT5G18403  
AT5G19710  
AT5G22270  
AT5G22420  
AT5G22490  
AT5G22580  
AT5G22600  
AT5G22799  
AT5G23000  
AT5G24210  
AT5G24215  
AT5G24352  
AT5G24530  
AT5G24790  
AT5G24879  
AT5G25540  
AT5G25890  
AT5G25980  
AT5G25995  
AT5G26000  
AT5G26060  
AT5G26140  
AT5G26260  
AT5G26280  
AT5G26290  
AT5G26620  
AT5G26660  
AT5G26667  
AT5G26673  
AT5G26692  
AT5G27493  
AT5G27495  
AT5G27944  
AT5G28491  
AT5G28610  
AT5G28630  
AT5G28650

---

---

AT5G30495  
AT5G33290  
AT5G34882  
AT5G35110  
AT5G35540  
AT5G35698  
AT5G35732  
AT5G35927  
AT5G36360  
AT5G36870  
AT5G36970  
AT5G37040  
AT5G37300  
AT5G37870  
AT5G37910  
AT5G37920  
AT5G37990  
AT5G38000  
AT5G38010  
AT5G38090  
AT5G38195  
AT5G38344  
AT5G38390  
AT5G38391  
AT5G38392  
AT5G38420  
AT5G38540  
AT5G38550  
AT5G38743  
AT5G38790  
AT5G39010  
AT5G39024  
AT5G39440  
AT5G39470  
AT5G39471  
AT5G39620  
AT5G39630  
AT5G39670  
AT5G39715  
AT5G40350  
AT5G40560  
AT5G40630  
AT5G41080  
AT5G41090  
AT5G41280  
AT5G41510

---

---

AT5G41630  
AT5G42060  
AT5G42223  
AT5G42280  
AT5G42510  
AT5G42630  
AT5G42797  
AT5G43066  
AT5G43185  
AT5G43350  
AT5G43480  
AT5G43510  
AT5G43570  
AT5G43650  
AT5G44005  
AT5G44306  
AT5G44578  
AT5G44580  
AT5G44630  
AT5G44720  
AT5G44940  
AT5G45090  
AT5G45320  
AT5G46025  
AT5G46050  
AT5G46140  
AT5G46320  
AT5G46980  
AT5G46990  
AT5G47229  
AT5G48000  
AT5G48010  
AT5G48110  
AT5G48280  
AT5G48515  
AT5G48605  
AT5G49260  
AT5G49750  
AT5G49860  
AT5G50175  
AT5G50423  
AT5G50760  
AT5G50790  
AT5G50910  
AT5G51360  
AT5G51390

---

---

AT5G51870  
AT5G51940  
AT5G52130  
AT5G52270  
AT5G52690  
AT5G52760  
AT5G52770  
AT5G53380  
AT5G53592  
AT5G53840  
AT5G54220  
AT5G54230  
AT5G54940  
AT5G55131  
AT5G55508  
AT5G55856  
AT5G56325  
AT5G56410  
AT5G56550  
AT5G56555  
AT5G57520  
AT5G60810  
AT5G60964  
AT5G62573  
AT5G62750  
AT5G64880  
AT5G65300  
AT5G66890

---

**Supplemental Table S2.** Primer sequences used in this study.

| <b>Experiment</b>          | <b>Primers (5' to 3')</b>                                  |
|----------------------------|------------------------------------------------------------|
| <b>RT-qPCR</b>             |                                                            |
| qFLC_F<br>qFLC_R           | CCGAACTCATGTTGAAGCTTGTTGAG<br>CGGAGATTTGTCCAGCAGGTG        |
| qFLM_F<br>qFLM_R           | CGCTGTTGTCGTCGTATCTGC<br>CAGTCTCAAGTTGTTCCCTCCAGAG         |
| qMAF2_F<br>qMAF2_R         | AACTCGGAATTATCTGCCACTCAAAG<br>CTTCCCCCATCATTAGTTCTGTCTTC   |
| qMAF3_F<br>qMAF3_R         | GAAAGGGAGAAGTTGCTGATAGAAGAG<br>AGCACAAGAACTCTGATATTTGTCTAC |
| qMAF4_F<br>qMAF4_R         | GCTTCTCCTCAGGTGATAGCATG<br>CTGCTCTTCCAGGGACTTTAGAC         |
| qMAF5_F<br>qMAF5_R         | TGTGTCGGAAGAGTGAAGCCAT<br>CTGATGATCTTGGCCATGCTGT           |
| qTUB2_F<br>qTUB2_R         | ACTGTCTCCAAGGGTTCCAGG<br>AAGAACCATGCACTCATCAGC             |
| <b>ChIP-qPCR</b>           |                                                            |
| FLC_a_F<br>FLC_a_R         | CCTAATTTGATCCTCAGGTTTGGG<br>CCGACGAAGAAAAAGTAGATAGGCAC     |
| FLC_b_F<br>FLC_b_R         | CCTTTTGCTGTACATAAACTGGTC<br>CCAAACTTCTTGATCCTTTTTACC       |
| FLC_c_F<br>FLC_c_R         | GTGGAAATTCAGATGTGCTACTG<br>ACTGGAAACTATGAAACATTGAGAG       |
| FLC_d_F<br>FLC_d_R         | TGGTTGTTATTTGGTGGTGTG<br>ATCTCCATCTCAGCTTCTGCTC            |
| MAF4_ChIP_F<br>MAF4_ChIP_R | TTAGGTCAGAAGAATTAGTCGGAG<br>GTGGCAGAGATGATGATAAGAGCG       |
| MAF5_ChIP_F<br>MAF5_ChIP_R | CAGGATCTCCGACCAGTTTATACAGAC<br>GAGGAGTTGTAGAGTTTGCCGGT     |
| TUB2_ChIP_F                | ATCCGTGAAGAGTACCCAGAT                                      |

---

|             |                       |
|-------------|-----------------------|
| TUB2_ChIP_R | AAGAACCATGCACTCATCAGC |
|-------------|-----------------------|

**Pull-down  
constructs**

|              |                                  |
|--------------|----------------------------------|
| HIRA_EcoRI_F | gttgaattcTGATTGCGGAGAAGCCCTTTTGG |
| HIRA_XhoI_R  | gttctcgagTCAAGAGCCCGAGTCTCTTGAG  |

|             |                                |
|-------------|--------------------------------|
| FRI_BamHI_F | gccggatccATGTCCAATTATCCACCGACG |
| FRI_EcoRI_R | gttgaattcCTATTTGGGGTCTAATGATG  |

**BiFC and Co-IP  
constructs**

|              |                                                         |
|--------------|---------------------------------------------------------|
| attB1_HiRA_F | ggggacaagttgtacaaaaaagcaggcttaATGATTGCGGAG<br>AAGCCCTTT |
|--------------|---------------------------------------------------------|

|              |                                                          |
|--------------|----------------------------------------------------------|
| attB2_HiRA_R | ggggaccactttgtacaagaaagctgggttAGAGCCCGAGTCT<br>CTTGAGTTC |
|--------------|----------------------------------------------------------|

|             |                                                        |
|-------------|--------------------------------------------------------|
| attB1_FRI_F | ggggacaagttgtacaaaaaagcaggcttaATGTCCAATTATC<br>CACCGAC |
|-------------|--------------------------------------------------------|

|             |                                                        |
|-------------|--------------------------------------------------------|
| attB2_FRI_R | ggggaccactttgtacaagaaagctgggttTTTGGGGTCTAATG<br>ATGAGT |
|-------------|--------------------------------------------------------|

---
